1 **The anterior cingulate cortex and its role in controlling contextual fear**  
2 **memory to predatory threats.**

3

4 **Authors: Miguel Antonio Xavier de Lima<sup>1</sup>, Marcus Vinicius C. Baldo<sup>2</sup>, Fernando**  
5 **A. Oliveira<sup>3</sup>, Newton Sabino Canteras<sup>1\*</sup>**

6

7 <sup>1</sup>Dept. Anatomy, Institute of Biomedical Sciences, University of São Paulo; São Paulo,  
8 SP 05508-000, Brazil.

9 <sup>2</sup>Dept. Physiology and Biophysics, Institute of Biomedical Sciences, University of São  
10 Paulo; São Paulo, SP 05508-000, Brazil.

11 <sup>3</sup>Cellular and Molecular Neurobiology Laboratory (LaNeC) - Center for Mathematics,  
12 Computing and Cognition (CMCC), Federal University of ABC, São Bernardo do  
13 Campo, SP 09606-045, Brazil

14

15 Number of words in abstract: 150; Number of words in manuscript: 5,010; Number of  
16 words in methods: 2,854; Number of figures: 7; Number of supplementary materials: 7

17

18

19

20 \*Corresponding Author:  
21 Newton Sabino Canteras, M.D., Ph.D.  
22 Department of Anatomy,  
23 Institute of Biomedical Sciences,  
24 University of Sao Paulo,  
25 Av. Lineu Prestes, 2415,  
26 CEP 05508-000 São Paulo, SP, Brazil  
27 Phone: +55.11.3091.7628 Fax: +55.11.3091.7285  
28 e-mail: [newton@icb.usp.br](mailto:newton@icb.usp.br)

29

30

31

32

33

1    **ABSTRACT**

2    Predator exposure is a life-threatening experience and elicits learned fear responses to the  
3    context in which the predator was encountered. The anterior cingulate area (ACA)  
4    occupies a pivotal position in a cortical network responsive to predatory threats, and it  
5    exerts a critical role in processing fear memory. Ours results revealed that the ACA is  
6    involved in both the acquisition and expression of contextual fear to predatory threat.  
7    Overall, the ACA can provide predictive relationships between the context and the  
8    predator threat and influences fear memory acquisition through projections to the  
9    basolateral amygdala and perirhinal region and the expression of contextual fear through  
10   projections to the dorsolateral periaqueductal gray. Our results expand previous studies  
11   based on classical fear conditioning and open interesting perspectives for understanding  
12   how the ACA is involved in processing contextual fear memory to ethologic threatening  
13   conditions that entrain specific medial hypothalamic fear circuits (i.e., predator- and  
14   conspecific-responsive circuits).

15

16   **Keywords** – fear memory, cerebral cortex, defensive behavior

17

## 1 INTRODUCTION

2 Predator exposure is a life-threatening experience and elicits innate fear behaviors as well  
3 as learned fear responses to the context in which the predator was encountered (Blanchard  
4 et al., 1989, 2001; Ribeiro-Barbosa et al., 2005). Recent studies revealed a cortical  
5 network that is responsive to predatory threats and exerts a critical role in processing fear  
6 memory. Thus, the caudal prelimbic area (PL), rostral part of the anterior cingulate area  
7 (ACA), medial visual area (VISm), and the ventral part of retrosplenial area (RSPv) form  
8 a highly interconnected circuit that presents a differential increase in Fos expression in  
9 response to predator exposure. Cytotoxic lesions of the elements of this cortical circuit  
10 apparently had no impact on innate fear responses during predator exposure but had a  
11 profound impact on contextual fear memory largely disrupting learned contextual fear  
12 responses in a predator-related environment (de Lima et al., 2019).

13 The ACA occupies a central position in this cortical network and establishes dense  
14 bidirectional connections with all other elements of the circuit. Importantly, lesions in  
15 the ACA had a larger impact on decreasing learned contextual fear responses versus  
16 lesions of the other elements of this cortical network (de Lima et al., 2019). However, at  
17 this point, it is not clear how the ACA is involved in processing predator-related fear  
18 memory.

19 Previous studies in the literature using fear conditioning to physically aversive stimuli  
20 (i.e., footshock) reported important roles for the ACA in fear memory. The ACA seems  
21 to be necessary for the acquisition of contextual fear. Pretraining inactivation of the ACA  
22 blocked fear acquisition (Tang et al., 2005; Bissière et al., 2008), and pretraining  
23 activation of the ACA using a mGluR agonist (Bissière et al., 2008) enhanced fear  
24 learning thus suggesting an involvement of the ACA in the acquisition of fear responses.

25 Of relevance, the insertion of an empty temporal gap, or trace, between the CS and UCS  
26 makes learning the association critically dependent on the prefrontal cortex. Recording  
27 studies in trace fear conditioning revealed units called “bridging cells” in the prefrontal  
28 cortex that maintain firing during the trace intervals perhaps reflecting the maintenance  
29 of attentional resources during the CS-USC interval (Gilmartin et al., 2014). These  
30 findings from trace fear conditioning suggest that the prefrontal cortex strengthens the  
31 predictive value of the available cue to influence memory storage. The ACA is also  
32 required for memory consolidation. Infusion of the protein-synthesis inhibitor anisomycin

1 in the ACA impairs memory consolidation of recent and remote memory (Einarsson  
2 and Nader, 2012), and virally mediated disruption of learning-induced dendritic spine  
3 growth in the ACA impairs memory consolidation (Vetere et al., 2011). In fact, the ACA  
4 has been largely associated with the encoding and retrieval of contextual fear memory at  
5 remote time points (Frankland et al., 2004; Kitamura et al., 2017; Abate et al., 2018).

6 Here, we examined how that ACA mediates predator fear memory. To this end, we  
7 exposed mice to cats and investigated innate and contextual fear responses. We started  
8 by asking whether the ACA is involved in the acquisition and/or expression predator fear  
9 memory and applied pharmacogenetic silencing in the ACA during exposure to the  
10 predator or to the context. Next, combining retrograde tracing and Fos protein  
11 immunostaining, we examined the pattern of activation of ACA source of inputs during  
12 acquisition and expression of predator fear responses. We could see how the ACA would  
13 be able to combine predator and contextual cues particularly during the acquisition phase.  
14 To complement these findings, during the cat exposure, we applied optogenetic inhibition  
15 to the anteromedial thalamic nucleus > ACA path, which putatively relays information  
16 related to the predator cues, and examined the effect on the acquisition of predator fear  
17 memory.

18 Next, using optogenetic silencing and functional tracing combining Fluoro Gold and Fos  
19 immunostaining, we examined how the ACA entrains selected targets to influence  
20 acquisition or expression of predator fear memory. The data help to clarify how the ACA  
21 influences both the acquisition and expression of predator fear memory. Overall, the ACA  
22 offers predictive relationships between the threaten stimuli and the context to influence  
23 memory storage in amygdalar and hippocampal circuits. It also has a role in memory  
24 retrieval and the expression of contextual fear. Our results open interesting perspectives  
25 for understanding how the ACA is involved in processing contextual fear memory to  
26 predator threats as well as other ethologic threatening condition such as those seen in the  
27 confrontation with a conspecific aggressor during social disputes.

28

## 29 **RESULTS**

30 **The ACA is involved in both the acquisition and expression of contextual fear to**  
31 **predator threat.** To specifically evaluate the contribution of the ACA in the acquisition  
32 and expression of contextual fear to a predatory threat, we used designer receptors

1 exclusively activated by designer drug (DREADD) to selectively silence the activity of  
2 the ACA during the cat exposure and during the exposure to the predatory context (Figure  
3 1). We used adeno-associated virus (AAV) expressing Gi-coupled hM4Di fused with  
4 mCitrine fluorescent protein (AAV5-hSyn-HA-hM4D(Gi)-IRES-mCitrine). We  
5 bilaterally injected the viral vector (AAV5-hSyn-HA-hM4D(Gi)-IRES-mCitrine) or a  
6 vector expressing only the fluorescent protein for the control group (AAV5-hSyn-eGFP)  
7 into the ACA. Patch clamp experiments showed that transfected neurons (Gi-DREADD  
8 neurons) hyperpolarized as they underwent extracellular CNO and presented a significant  
9 decrease in the triggering of action potentials after 10  $\mu$ M CNO (S Fig. 3). Four weeks  
10 after the viral injection, the group of animals injected with virus expressing Gi-coupled  
11 hM4Di or the control virus received CNO intraperitoneally 30 min before the cat exposure  
12 or the exposure to the predatory context.

13 The results showed that compared to the control group, animals expressing Gi-coupled  
14 hM4Di treated before the cat exposure did not change innate responses but significantly  
15 reduced contextual fear responses (Figure 1B). Thus, during exposure to the predatory  
16 context, the animals presented a significant decrease in the risk assessment responses and  
17 increase in fearless exploration (Figure 1B). Likewise, CNO treatment before the  
18 exposure to the predatory context also significantly reduced risk assessment and increased  
19 exploration in animals injected with virus expressing Gi-coupled hM4Di (Figure 1C). The  
20 results suggest that silencing the ACA does not influence innate fear responses but affects  
21 both the acquisition and the expression of contextual fear to predator threat. Complete  
22 statistical analysis for the behavioral data of ACA pharmacogenetic inhibition is found in  
23 the supplementary materials (S7a).

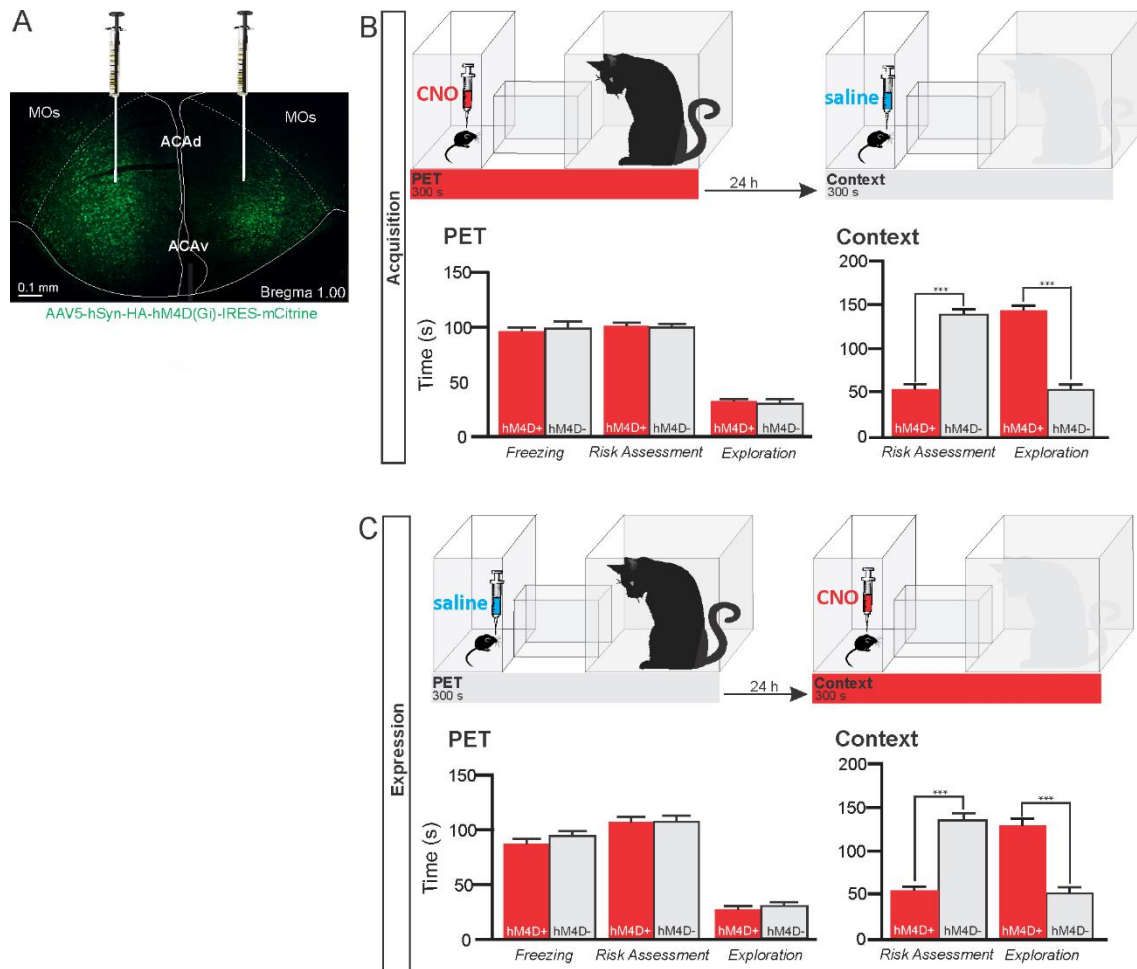

1

2 **Figure 1. Pharmacogenetic inhibition of the ACA during acquisition and expression**  
 3 **of contextual fear to predator threat.** **A.** Fluorescence photomicrograph illustrating the  
 4 bilateral injection in the ACA of a viral vector expressing inhibitory DREADD (hM4D  
 5 Gi) fused with mCitrine. **B.** Pharmacogenetic inhibition of the ACA during the cat  
 6 exposure (acquisition phase): (top) Experimental design, and (bottom) mean ( $\pm$  SEM)  
 7 values of the behavioral responses during Predator Exposure (PET) and Predatory  
 8 Context (Context). For inhibition during PET- Groups: hM4D+ ( $n=7$ ) and hM4D- ( $n=6$ ).  
 9 **C.** Pharmacogenetic inhibition of the ACA during the predatory context (expression  
 10 phase): (top) Experimental design, and (bottom) mean ( $\pm$  SEM) values of the behavioral  
 11 responses during Predator Exposure (PET) and Predatory Context (Context). For  
 12 inhibition during Context - Groups: hM4D+ ( $n=7$ ) and hM4D- ( $n=5$ ). Data are shown as  
 13 mean  $\pm$  SEM. 2 x 2 univariate ANOVAs for freezing and three-way ANOVAs for risk  
 14 assessment and exploration followed by Tukey's HSD test post hoc analysis  
 15 (\*\*\*) $p<0.001$ ). Abbreviations: ACAAd, anterior cingulate area, dorsal part; ACAV, anterior  
 16 cingulate area, ventral part; CNO, clozapine N-oxide; MOs, secondary motor area; PET,  
 17 predator exposure test.

18

19

1 **Pattern of activation of the different sources of inputs to the ACA during the**  
2 **exposure to the cat and to the predatory context.** Considering the influence of the ACA  
3 in the acquisition and expression of contextual fear to predatory threat, we next examined  
4 the pattern of activation of the different sources of inputs to the ACA during the exposure  
5 to the cat and to the predatory context. To this end, animals received unilateral deposits  
6 of a retrograde tracer (Fluoro Gold) in the ACA. One week later, groups of animals were  
7 exposed either to the cat only (Figure 2) or to the predatory context (S Fig. 5) and perfused  
8 90 min later. For each one of these groups, we examined the percentage of Fluoro Gold  
9 labeled cells expressing Fos protein to see the activation pattern of the ACA inputs during  
10 the acquisition and expression of contextual fear. During the cat exposure, among the  
11 cortical inputs, the ventral retrosplenial (RSPv) and anteromedial visual (VISam) areas  
12 presented the largest percentage of FG retrogradely-labeled cells expressing Fos (around  
13 50% of the retrogradely labeled cells); the other cortical inputs to the ACA, including the  
14 medial orbital (ORBm) and prelimbic (PL) areas, displayed close to 30% of double  
15 labeled cells (Figure 2C). According to our results, inputs to the ACA from the RSPv and  
16 VISm seem particularly activated during the acquisition phase of predator fear memory  
17 and are known to be involved in computing contextual landmarks (see Discussion).

18 In addition, during cat exposure, a particularly large percentage of FG/Fos double labeled  
19 cells were found in the central lateral (CL) and ventral anteromedial thalamic (AMv)  
20 nuclei—both of these contained more than 50% retrogradely labeled expressing Fos  
21 protein (Figure 2C). Notably, the CL and AMv are likely to convey information regarding  
22 the predatory threat (see Discussion). We also found that, during cat exposure, inputs to  
23 the ACA from the basolateral amygdala nucleus, ventral hippocampus, lateral entorhinal  
24 area, and claustrum presented 25% to 30% FG/FOS double labeled cells (Figure 2C).

25 Exposure to the predatory context resulted in a different profile on the activation of the  
26 inputs to the ACA (S Fig. 5). Thus, during exposure to the predatory context, all cortical  
27 inputs to the ACA as well as the inputs from the basolateral amygdala and lateral  
28 entorhinal area presented close to 20% to 30% of FG-labeled cells expressing Fos protein  
29 (S Fig. 5C). In the thalamus, the AMv displayed a relatively low percentage of double  
30 labeled cells (close to 20%) whereas the central lateral nucleus contained close to 40% of  
31 the retrogradely-labeled cells expressing Fos protein (S Fig. 5C). Taken together, these  
32 findings revealed a differential activation among the inputs to the ACA during the  
33 acquisition and expression of the predator fear contextual memory suggesting the inputs



- 1 from the VISm, RSPv, and AMv particularly activated during the acquisition phase
- 2 whereas the CL inputs were largely activated during both the acquisition and expression
- 3 of contextual fear memory to predatory threat.

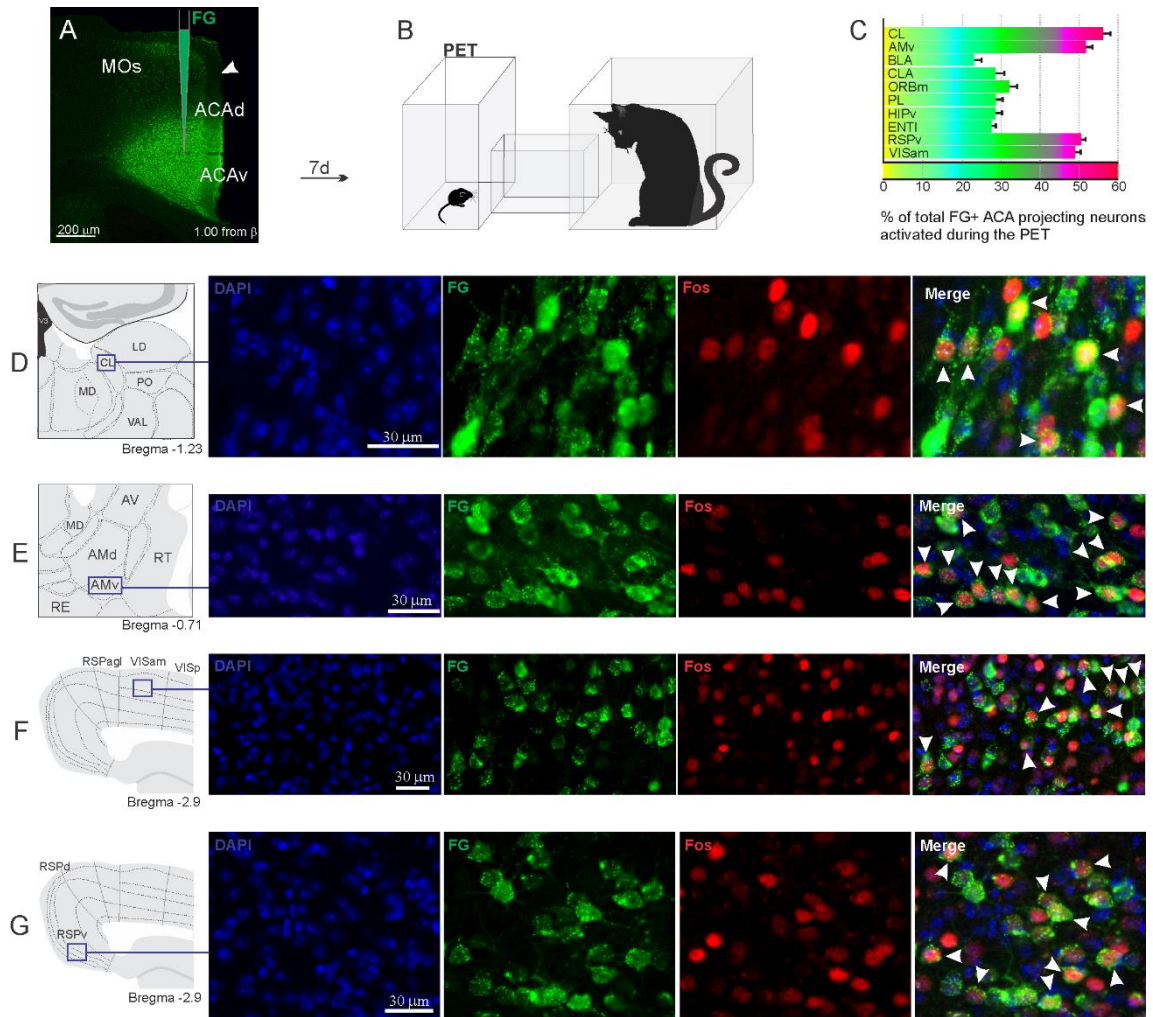

4

5 **Figure 2. Pattern of activation of the different sources of inputs to the ACA during**  
6 **the exposure to the cat.** Animals received unilateral deposit of a retrograde tracer (Fluoro  
7 Gold) in the ACA (n=6, **A**). Seven days later, animals were exposed to the cat (PET, **B**)  
8 and perfused 90 min after. **C**. Bar chart presents, for each designated structure, the  
9 proportion of activated neurons (*FG/Fos* double labeled cells) during the PET condition,  
10 among the total of FG retrogradely labeled cells (error bars indicate 95% confidence  
11 interval for a proportion). **D-G**. Schematic drawings from the *Allen Mouse Brain Atlas* to  
12 show the sites containing the largest proportion of *FG/Fos* double labeled cells, followed  
13 by fluorescence photomicrographs illustrating DAPI-staining, FG labeled cells in green  
14 (Alexa 488), Fos protein positive cells labeled in red (Alexa 594) and merged view of the  
15 FG and FOS labeled cells, where arrow heads indicate FG/FOS double labeled cells.  
16 Abbreviations: ACAd, anterior cingulate area, dorsal part; ACAv, anterior cingulate area,  
17 ventral part; AMd, anteromedial thalamic nucleus, dorsal part; AMv, anteromedial  
18 thalamic nucleus, ventral part; AV, anteroventral nucleus of thalamus; BLA, basolateral



1 amygdalar nucleus; CL, central lateral nucleus of the thalamus; CLA, claustrum; ENTl,  
2 entorhinal area, lateral part; FG, Fluoro gold; HIPv, hippocampus, ventral part; LD,  
3 lateral dorsal nucleus of the thalamus; MD, mediodorsal nucleus of the thalamus; MOs,  
4 secondary motor area; ORBm, orbital area, medial part; PET, predator exposure test; PL,  
5 prelimbic area; PO, posterior complex of the thalamus; RE, nucleus of reuniens; RSPagl,  
6 retrosplenial area, lateral agranular part; RSPd, retrosplenial area, dorsal part; RSPv,  
7 retrosplenial area, ventral part; RT, reticular nucleus of the thalamus; VAL, ventral  
8 anterior-lateral complex of the thalamus; VISam, anteromedial visual area; VISp, primary  
9 visual area.

10

11 **AM > ACA projection controls the acquisition of contextual fear responses to**  
12 **predator threats.** Considering that the AMv is one of the inputs to the ACA presenting  
13 the largest activation during cat exposure, we employed projection-based silencing  
14 approach to investigate the effect of the inhibition of the AM > ACA projection on the  
15 acquisition of contextual fear to cat exposure. For the AM > ACA projection  
16 photoinhibition, adeno-associated viral (AAV) vectors encoding halorhodopsin-3.0 fused  
17 with mCherry fluorescence protein (AAV5-hSyn-eNpHR3-mCherry) or AAV control  
18 vectors not expressing halorhodopsin-3.0 encoding mCherry fluorescence protein  
19 (AAV5-hSyn-mCherry) were injected bilaterally into the AM (Figure 3 A, B). To test the  
20 efficiency of light-induced hyperpolarization in eNpHR3.0-expressing neurons, the patch  
21 clamp experiments in neurons transfected with halorhodopsin revealed a robust  
22 hyperpolarization with 585 nm light on with clear linear regression due to different light  
23 intensities (S Fig. 4).

24 A 589 nm laser light was continually delivered to the ACA during the 5 min of cat  
25 exposure through surgically implanted dual-fiber optic elements (Figure 3C). Specific  
26 viral expression in the AM was confirmed for each mouse after behavioral testing by  
27 microscopic observation. Our results showed that photoinhibition of the AM > ACA  
28 projection during cat exposure did not change innate fear responses but significantly  
29 reduced contextual fear response and impaired the acquisition of contextual fear response  
30 to a predator threat (Figure 3E). Thus, the animals presented a significant decrease in the  
31 risk assessment responses and increase in fearless exploration during exposure to the  
32 predatory context (Figure 3E). Complete statistical analysis for the behavioral data of the  
33 photoinhibition of the AM > ACA projection is supplied in the supplementary material  
34 (S7b). Here, the AM may convey predator cues to the ACA processed in the hypothalamic

- 1 predator-responsive circuit; this finding nicely suits the known roles of the ACA in
- 2 attention and assessment of cue salience during the learning processes (see Discussion).

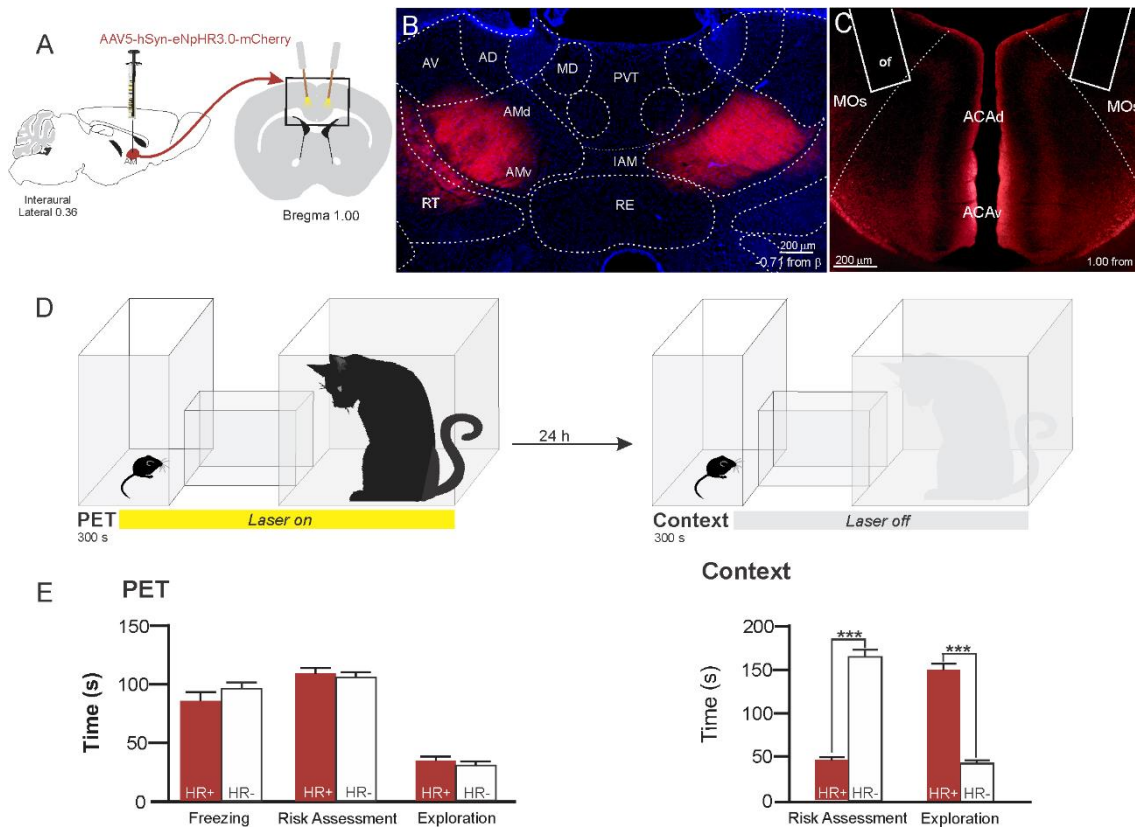

3

4 **Figure 3. Optogenetic inhibition of anteromedial thalamic nucleus > ACA pathway**  
 5 **during cat exposure.** **A.** Schematics showing the location of the bilateral AAV viral  
 6 vector injection in the anteromedial thalamic nucleus (AM) and the position of bilateral  
 7 optical fibers implanted in the ACA. **B.** Fluorescence photomicrographs illustrating the  
 8 bilateral injection in the AM of a viral vector expressing halorhodopsin-3.0 (eNpHR3.0)  
 9 fused with mCherry. **C.** Fluorescence photomicrograph illustrating the mCherry  
 10 anterograde labeled projection to the ACA (*of* - the optic fibers' tips position). **D.**  
 11 Experimental design. **E.** Mean ( $\pm$  SEM) values of the behavioral responses during  
 12 Predator Exposure (PET) and Predatory Context (Context). Data are shown as mean  $\pm$   
 13 SEM. Groups: HR+ ( $n=8$ ) and HR- ( $n=7$ ). One-way ANOVA for freezing and 2x2  
 14 ANOVAs for risk assessment and exploration followed by Tukey's HSD test post hoc  
 15 analysis ( $***p<0.001$ ). Abbreviations: ACAd, anterior cingulate area, dorsal part; ACAv,  
 16 anterior cingulate area, ventral part; AD, anterodorsal nucleus of thalamus; AMd,  
 17 anteromedial thalamic nucleus, dorsal part; AMv, anteromedial thalamic nucleus, ventral  
 18 part; AV, anteroventral nucleus of thalamus; IAM, interanteromedial nucleus of the  
 19 thalamus; MD, mediodorsal nucleus of the thalamus; MOs, secondary motor area; of,  
 20 optical fiber; PET, predator exposure test; PVT, paraventricular; nucleus of the thalamus;  
 21 RE, nucleus of reuniens; RT, reticular nucleus of the thalamus.

22

1 **Differential roles of ACA projection targets on the acquisition and expression of**  
2 **contextual fear to predator threat.** This work used optogenetic silencing and functional  
3 tracing combining Fluoro Gold and Fos immunostaining. We examined how the ACA  
4 entrains selective targets to influence acquisition or expression of predator fear memory.  
5 Among the ACA targets, we start by exploring projections to the basolateral amygdala  
6 and the perirhinal area—these are key targets for the prefrontal cortex to influence  
7 associative plasticity and memory storage in the amygdala and hippocampus (see  
8 Gilmartin et al., 2014). Next, we examined the ACA projection to the post-subiculum  
9 (POST), which has a large influence on the medial performant path, and conceivably in  
10 the memory processing (Ding, 2013). Finally, we explored the projection to the  
11 dorsolateral periaqueductal because studies have shown its putative roles both in the  
12 acquisition and the expression of contextual fear memory to predator threat (Cezário et  
13 al., 2008; de Andrade Rufino et al., 2019); therefore, a likely ACA target to influence  
14 such responses. As illustrated in the Supplementary Figure 6, the pattern of ACA  
15 projection to each one of these selected targets were examined using viral tracing.

16 We employed projection-based silencing of the ACA projections to each one of the  
17 selected targets and tested the effect of photoinhibition during the acquisition phase and  
18 the expression of contextual fear to animals previously exposed to the cat. To this end,  
19 adeno-associated viral (AAV) vectors encoding halorhodopsin-3.0 fused with mCherry  
20 fluorescence protein (AAV5-hSyn-eNpHR3-mCherry) or AAV control vectors not  
21 expressing halorhodopsin-3.0 encoding mCherry fluorescence protein (AAV5-hSyn-  
22 mCherry) were injected bilaterally into the ACA (Figs 4A, 5A, 6A, and 7A). A 589 nm  
23 laser light was continually delivered through surgically implanted dual-fiber optic  
24 elements to each one of the ACA selected targets (Figs 4B, 5B, 6B and 7B) during the 5  
25 min exposure to the cat or the predatory context.

26 We also ran functional tracing experiments. Here, each one of the ACA selected targets  
27 received a unilateral deposit of a retrograde tracer (Fluoro Gold). One week later, animals  
28 were exposed either to the cat only or to the predatory context and perfused 90 min after  
29 (Figs. 4E, G; 5E, G; 6E, G and 7E, G). For each one of these targets, we examined the  
30 percentage of Fluoro Gold labeled cells expressing Fos protein in the ACA in response to  
31 the cat exposure or exposure to the predatory context.

32 *ACA > BLA projection.* Our results showed that photoinhibition of the ACA > BLA  
33 projection during cat exposure did not change innate fear responses but significantly

1 reduced contextual fear responses reducing risk assessment and increasing exploration  
2 compared to the control group (Fig 4D). Conversely, photoinhibition of the ACA > BLA  
3 projection in eNpHR3.0-expressing mice during predatory context did not change the risk  
4 assessment and exploration times compared to the control group (Fig. 4F). The results  
5 suggest that photoinhibition of the ACA > BLA projection impairs the acquisition but not  
6 the expression of contextual fear response to a predator threat. Complete statistical  
7 analysis for the behavioral data of the photoinhibition of the AM > BLA projection is  
8 supplied in the supplementary material (S7c).

9 Animals that received FG injection in the BLA underwent statistical analysis (chi-square  
10 test) of the functional tracing. The results revealed a significant difference between the  
11 proportion of *FG/Fos* double labeled cells in the cat exposure condition as compared to  
12 the predatory context condition ( $\chi^2[0.05,1]=84.12$ ;  $p<0.001$ ). The ACA contained a  
13 significantly larger percentage of double-labeled Fos/FG cells in animals exposed to the  
14 cat (83.2%) compared to those exposed to the predatory context (23.8%) (Fig. 4E, G).  
15 This suggests a larger engagement of the ACA cells projecting to the BLA during the  
16 acquisition compared to the expression of contextual fear anti-predatory responses.

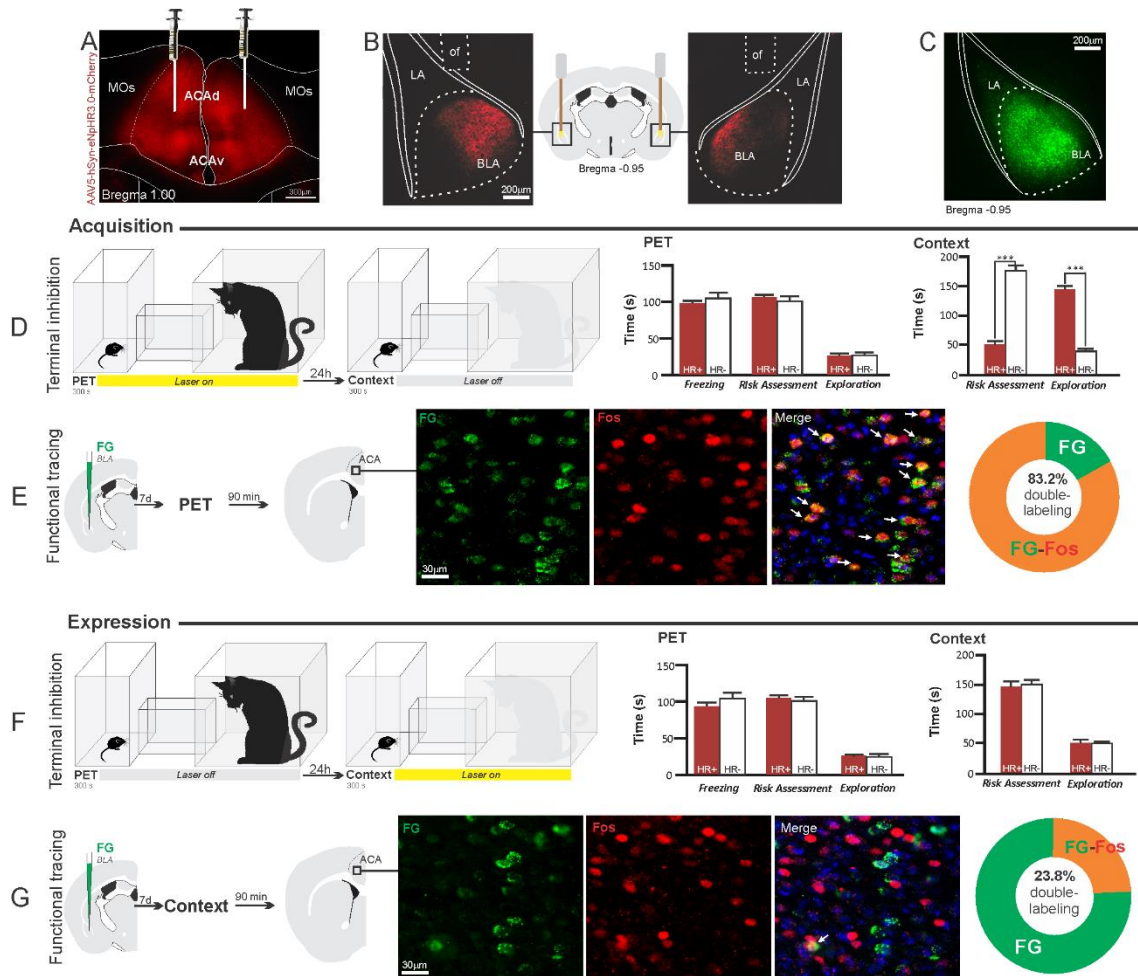

1

2 **Figure 4. Optogenetic silencing and functional tracing of the ACA > BLA pathway**  
 3 **during the acquisition and expression of contextual fear to predator threat. A. A.**  
 4 Fluorescence photomicrograph illustrating the bilateral injection in the ACA of a viral  
 5 vector expressing halorhodopsin-3.0 (eNpHR3.0) fused with mCherry. **B.** Schematic  
 6 drawing (center) and fluorescence photomicrographs showing the ACA projections to the  
 7 BLA and location of bilateral optical fibers implanted close to the basolateral amygdala  
 8 (*of* - optic fibers' tips position). **C.** Fluorescence photomicrograph illustrating the FG  
 9 injection in the BLA for the functional tracing. **D and F.** Optogenetic silencing of the  
 10 ACA > BLA pathway during the cat exposure (**D**) or predatory context (**F**). Experimental  
 11 design (on the left) and mean ( $\pm$  SEM) values of the behavioral responses during Predator  
 12 Exposure (PET) and Predatory Context (on the right). For silencing during PET condition  
 13 - Groups: HR+ ( $n = 8$ ) and HR- ( $n = 6$ ); for silencing during Context condition - Groups:  
 14 HR+ ( $n = 8$ ) and HR- ( $n = 6$ ). Data are shown as mean  $\pm$  SEM. 2 x 2 ANOVA for freezing  
 15 and three-way ANOVAs for risk assessment and exploration followed by Tukey's HSD  
 16 test post hoc analysis (\*\*\*) $p < 0.001$ . **E and G.** Functional tracing of the ACA > BLA  
 17 pathway during the cat exposure (acquisition phase, **E**) and the predatory context  
 18 (expression phase, **G**). Left - Experimental design: unilateral FG injection in the BLA,  
 19 and 7 days later perfusion 90 min after the cat exposure ( $n=4$ , **E**) or the context exposure  
 20 ( $n=4$ , **G**). Center - Fluorescence photomicrographs illustrating, in the ACA, FG labeled  
 21 cells in green (Alexa 488), Fos protein positive cells labeled in red (Alexa 594) and



1 merged view of the FG and FOS labeled cells (arrows indicate FG/FOS double labeled  
2 cells). Right – Graphic representation of the percentage of FG/Fos double labeled cells in  
3 the ACA. Abbreviations - ACAd, anterior cingulate area, dorsal part; ACAv, anterior  
4 cingulate area, ventral part; BLA, basolateral amygdalar nucleus; FG, Fluoro gold; LA,  
5 lateral amygdalar nucleus; MOs, secondary motor area; of, optical fiber; PET, predator  
6 exposure test.

7

8 *ACA > PERI projection*. The results showed that photoinhibition of the ACA > PERI  
9 projection during cat exposure did not change innate fear responses but significantly  
10 reduced contextual fear responses reducing risk assessment and increasing exploration  
11 compared to the control group (Fig 5D). Conversely, photoinhibition of the ACA > PERI  
12 projection in eNpHR3.0-expressing mice during predatory context did not change the risk  
13 assessment and exploration times versus the control group (Fig. 5F). The results suggest  
14 that silencing the ACA > PERI projection impairs the acquisition but not the expression  
15 of contextual fear response to a predator threat. Complete statistical analysis for the  
16 behavioral data of the photoinhibition of the AM > PERI projection is supplied in the  
17 supplementary material (S7d).

18 For the animals that received the retrograde FG injection in the PERI, the statistical  
19 analysis (chi-square test) of the functional tracing results revealed a significant difference  
20 between the proportion of *FG/Fos* double labeled cells in the cat exposure condition  
21 versus the predatory context condition ( $\chi^2[0.05,1]=56.552$ ;  $p<0.001$ ); here, the ACA  
22 contained a significantly larger percentage of double-labeled Fos/FG cells in animals  
23 exposed to the cat (47.3%) compared to those exposed to the predatory context (15.1%)  
24 (Fig. 5E, G). This suggests a larger engagement of the ACA cells projecting to the PERI  
25 during the acquisition compared to the expression of contextual fear responses.



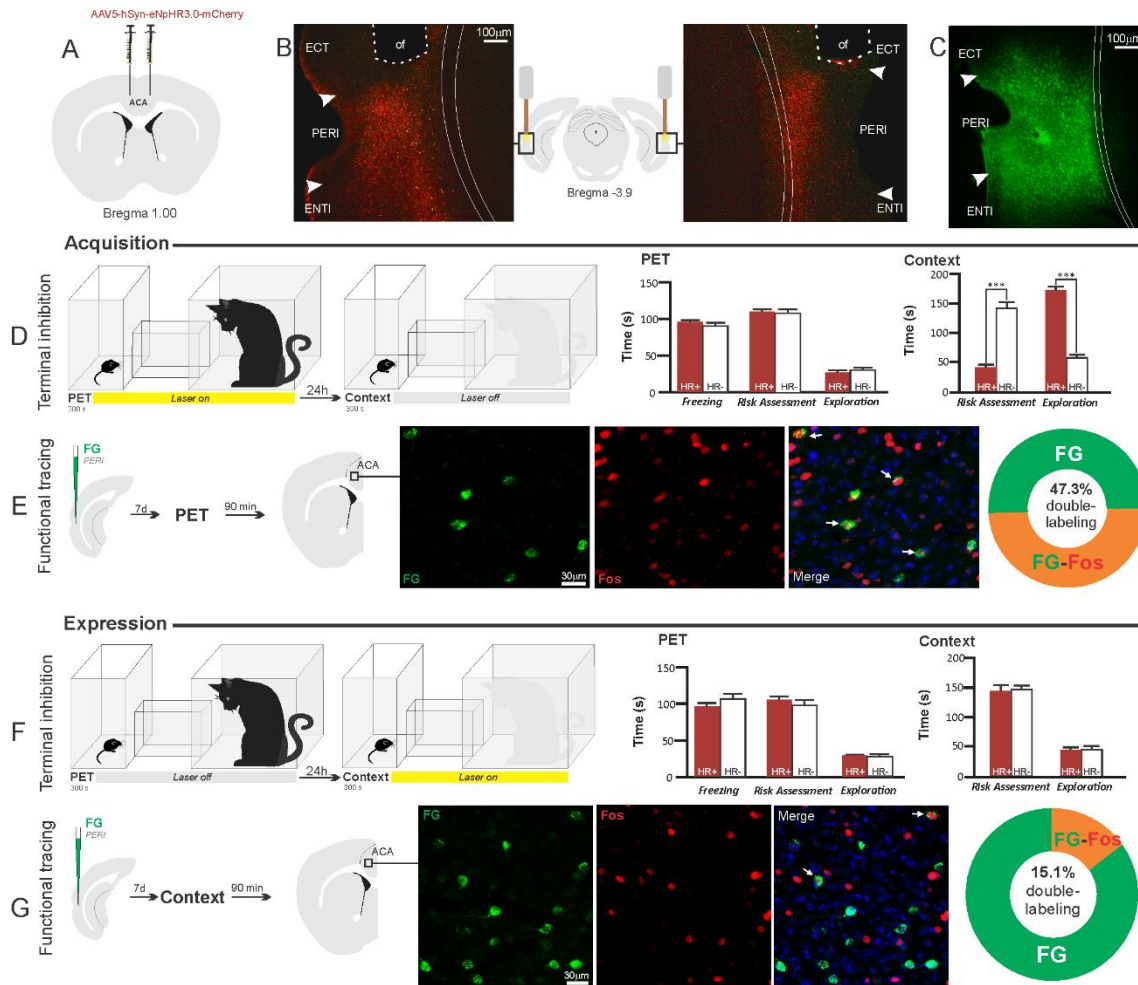

1

2 **Figure 5. Optogenetic silencing and functional tracing of the ACA > PERI pathway**  
3 **during the acquisition and expression of contextual fear to predator threat. A.**  
4 Schematic drawing illustrating the bilateral injection in the ACA of a viral vector  
5 expressing halorhodopsin-3.0 (eNpHR3.0) fused with mCherry. **B.** Schematic drawing  
6 (center) and fluorescence photomicrographs showing the ACA projections to the PERI  
7 and location of bilateral optical fibers implanted close to the PERI (*of* - optic fibers' tips  
8 position). **C.** Fluorescence photomicrograph illustrating the FG injection in the PERI for  
9 the functional tracing. **D and F.** Optogenetic silencing of the ACA > PERI pathway  
10 during the cat exposure (**D**) or predatory context (**F**). Experimental design (on the left),  
11 and mean ( $\pm$  SEM) values of the behavioral responses during Predator Exposure (PET)  
12 and Predatory Context (on the right). For silencing during PET condition - Groups: HR+  
13 ( $n=6$ ) and HR- ( $n=5$ ); for silencing during Context condition - Groups: HR+ ( $n=6$ ) and  
14 HR- ( $n=5$ ). Data are shown as mean  $\pm$  SEM. 2 x 2 ANOVA for freezing and three-way  
15 ANOVAs for risk assessment and exploration followed by Tukey's HSD test post hoc  
16 analysis (\* $p<0.001$ ). **E and G.** Functional tracing of the ACA > PERI pathway during the  
17 cat exposure (acquisition phase, **E**) and the predatory context (expression phase, **G**). Left  
18 - Experimental design: unilateral FG injection in the PERI, and 7 days later perfusion 90  
19 min after the cat exposure ( $n=4$ , **E**) or the context exposure ( $n=4$ , **G**). Center -  
20 Fluorescence photomicrographs illustrating, in the ACA, FG labeled cells in green (Alexa  
21 488), Fos protein positive cells labeled in red (Alexa 594) and merged view of the FG and

1 FOS labeled cells (arrows indicate FG/FOS double labeled cells). Right – Graphic  
2 representation of the percentage of FG/Fos double labeled cells in the ACA.  
3 Abbreviations - ACA, anterior cingulate area; ECT, ectorhinal area; FG, Fluoro gold; of,  
4 optical fiber; PET, predator exposure test; ENTl, entorhinal area, lateral part; PERl,  
5 perirhinal area.

6

7 *ACA > POST projection*. Compared to the control group, NpHR3.0-expressing mice that  
8 received photoinhibition of the ACA > POST projection during cat exposure or predatory  
9 context did not change the risk assessment responses and fearless exploration during  
10 exposure to the environment previously visited by a predator (Fig. 6D, F). The results  
11 suggest that silencing the ACA > POST projection apparently had no effect on the  
12 acquisition and expression of contextual fear to a predator threat. Complete statistical  
13 analysis for the behavioral data of the photoinhibition of the AM > POST projection is  
14 supplied in the supplementary material (S7e).

15 In line with this view, functional tracing in POST FG-injected animals revealed that the  
16 ACA contained a relatively low percentage of double-labeled Fos/FG cells in response  
17 either to the cat (21.3%) (Fig. 7E) or the predatory context (19%) (Fig. 6G). The statistical  
18 analysis (chi-square test) revealed no significant difference between the proportion of  
19 *FG/Fos* double-labeled cells in the cat exposure condition versus the predatory context  
20 condition ( $\chi^2[0.05,1]=0.05206$ ;  $p>0.75$ ). Thus, there is a relatively small engagement of  
21 the ACA cells projecting to the POST during both the acquisition and expression of  
22 contextual fear anti-predatory responses.

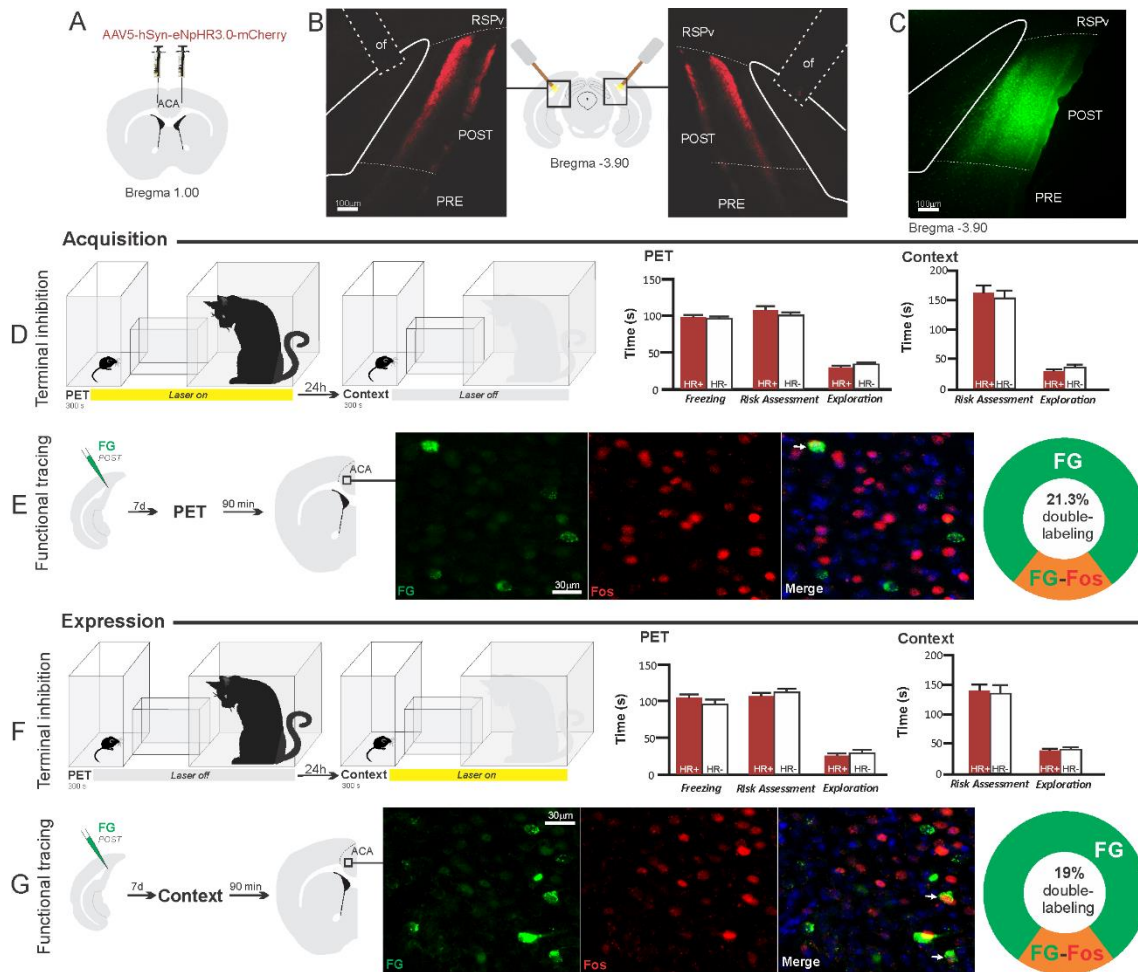

1

2 **Figure 6. Optogenetic silencing and functional tracing of the ACA > POST pathway**  
 3 **during the acquisition and expression of contextual fear to predator threat. A.**  
 4 Schematic drawing illustrating the bilateral injection in the ACA of a viral vector  
 5 expressing halorhodopsin-3.0 (eNpHR3.0) fused with mCherry. **B.** Schematic drawing  
 6 (center) and fluorescence photomicrographs showing the ACA projections to the POST  
 7 and location of bilateral optical fibers implanted close to the POST (*of* - optic fibers' tips  
 8 position). **C.** Fluorescence photomicrograph illustrating the FG injection in the POST for  
 9 the functional tracing. **D and F.** Optogenetic silencing of the ACA > POST pathway  
 10 during the cat exposure (**D**) or predatory context (**F**). Experimental design (on the left)  
 11 and mean ( $\pm$  SEM) values of the behavioral responses during Predator Exposure (PET)  
 12 and Predatory Context (on the right). For silencing during PET condition - Groups: HR+  
 13 ( $n=6$ ) and HR- ( $n=5$ ); for silencing during Context condition - Groups: HR+ ( $n=7$ ) and  
 14 HR- ( $n=5$ ). Data are shown as mean  $\pm$  SEM. 2 x 2 ANOVA for freezing and three-way  
 15 ANOVAs for risk assessment and exploration followed by Tukey's HSD test post hoc  
 16 analysis. **E and G.** Functional tracing of the ACA > POST pathway during the cat  
 17 exposure (acquisition phase, **E**) and the predatory context (expression phase, **G**). Left -  
 18 Experimental design: unilateral FG injection in the POST, and 7 days later perfusion 90  
 19 min after the cat exposure ( $n=4$ , **E**) or the context exposure ( $n=4$ , **G**). Center -  
 20 Fluorescence photomicrographs illustrating, in the ACA, FG labeled cells in green (Alexa  
 21 488), Fos protein positive cells labeled in red (Alexa 594) and merged view of the FG and

1 FOS labeled cells (arrows indicate FG/FOS double labeled cells). Right – Graphic  
2 representation of the percentage of FG/Fos double labeled cells in the ACA.  
3 Abbreviations - ACA, anterior cingulate area; FG, Fluoro gold; of, optical fiber; PET,  
4 predator exposure test; POST, postsubiculum; PRE, presubiculum; RSPv, retrosplenial  
5 area, ventral part.

6

7 *ACA > PAGdl projection*. These results revealed that photoinhibition of the ACA >  
8 PAGdl projection during cat exposure did not change innate or contextual fear responses  
9 (Fig. 7D). Conversely, compared to the control group, photoinhibition of the ACA >  
10 PAGdl projection during exposure to the predatory context in eNpHR3.0-expressing mice  
11 yielded a significant decrease in the risk assessment and an increase in exploration (Fig.  
12 7F). The results showed that photoinhibition of the ACA > PAGdl projection had no effect  
13 on the acquisition but impaired the expression of contextual fear to a predator threat.  
14 Complete statistical analysis for the behavioral data of the photoinhibition of the AM >  
15 PAGdl projection is supplied in the supplementary material (S7f).

16 For the animals that received the retrograde FG injection in the PAGdl, the statistical  
17 analysis (chi-square test) of the functional tracing results revealed a significant difference  
18 between the proportion of *FG/Fos* double labeled cells in the cat exposure condition as  
19 compared to the predatory context condition ( $\chi^2[0.05, 1]=79.624$ ;  $p<0.001$ ). The ACA  
20 contained a significantly larger percentage of double labeled Fos/FG cells in animals  
21 exposed to the predatory context (75.3%) (Fig. 7G) compared to those exposed to the cat  
22 (29.5%) (Fig. 7E). This suggests a larger engagement of the ACA cells projecting to the  
23 PAGdl during the expression compared to the acquisition of contextual fear responses.



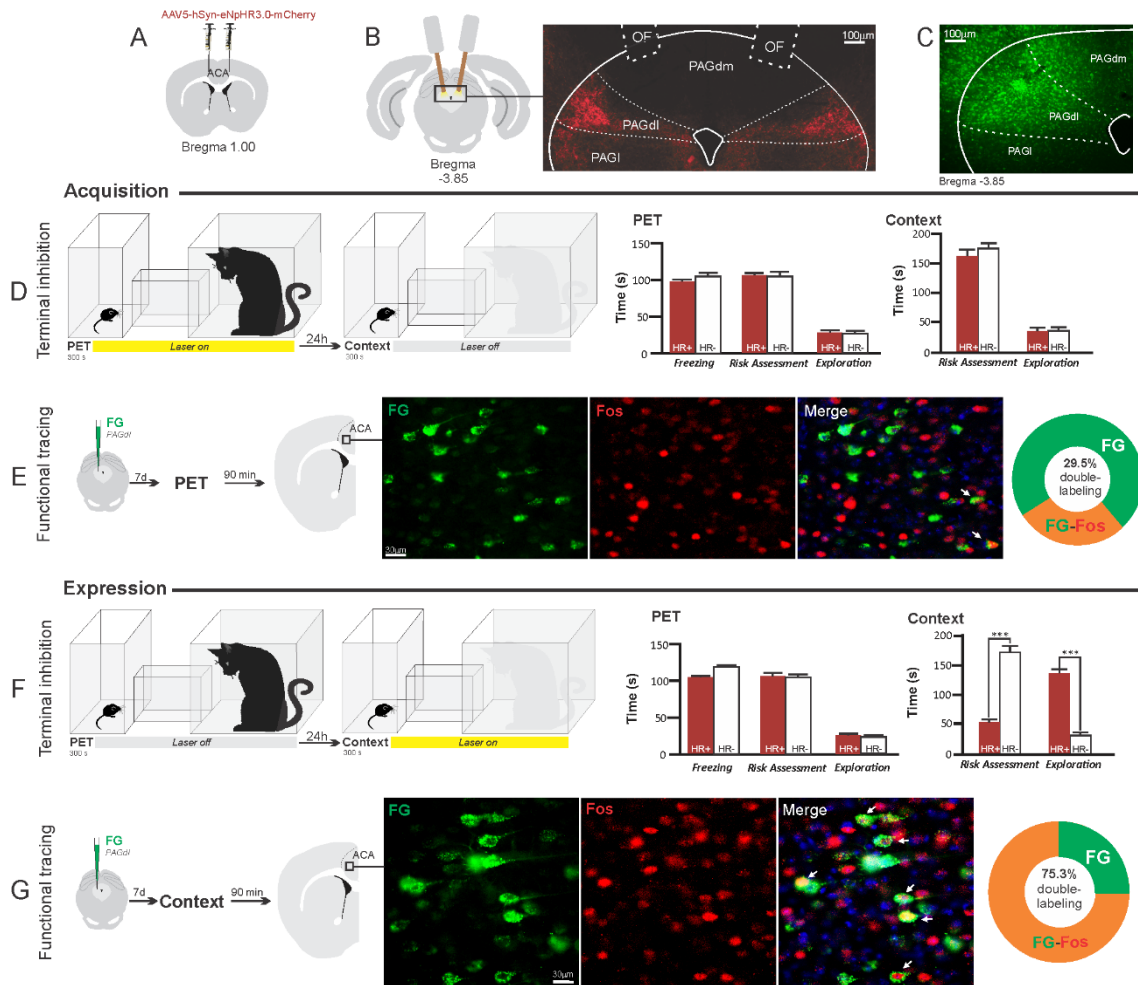

1

2 **Figure 7. Optogenetic silencing and functional tracing of the ACA > PAGdl pathway**  
3 **during the acquisition and expression of contextual fear to predator threat. A.**  
4 Schematic drawing illustrating the bilateral injection in the ACA of a viral vector  
5 expressing halorhodopsin-3.0 (eNpHR3.0) fused with mCherry. **B.** Schematic drawing  
6 (left) and fluorescence photomicrograph (right) showing the ACA projections to the  
7 PAGdl and location of bilateral optical fibers implanted close to the PAGdl (*of* - optic  
8 fibers' tips position). **C.** Fluorescence photomicrograph illustrating the FG injection in  
9 the PAGdl for the functional tracing. **D and F.** Optogenetic silencing of the ACA >  
10 PAGdl pathway during the cat exposure (**D**) or the predatory context (**F**). Experimental  
11 design (on the left) and mean ( $\pm$  SEM) values of the behavioral responses during Predator  
12 Exposure (PET) and Predatory Context (on the right). For silencing during PET condition  
13 - Groups: HR+ ( $n=7$ ) and HR- ( $n=5$ ); for silencing during Context condition - Groups:  
14 HR+ ( $n=9$ ) and HR- ( $n=5$ ). Data are shown as mean  $\pm$  SEM. 2 x 2 ANOVA for freezing  
15 and three-way ANOVAs for risk assessment and exploration followed by Tukey's HSD  
16 test post hoc analysis ( $*p<0.001$ ). **E and G.** Functional tracing of the ACA > PAGdl  
17 pathway during the cat exposure (acquisition phase, **E**) and the predatory context  
18 (expression phase, **G**). Left - Experimental design: unilateral FG injection in the PAGdl,  
19 and 7 days later perfusion 90 min after the cat exposure ( $n=4$ , **E**) or the context exposure  
20 ( $n=4$ , **G**). Center - Fluorescence photomicrographs illustrating, in the ACA, FG labeled  
21 cells in green (Alexa 488), Fos protein positive cells labeled in red (Alexa 594) and

1 merged view of the FG and FOS labeled cells (arrows indicate FG/FOS double labeled  
2 cells). Right – Graphic representation of the percentage of FG/Fos double labeled cells in  
3 the ACA. Abbreviations - ACA, anterior cingulate area; FG, Fluoro gold; of, optical fiber;  
4 PAGdl, periaqueductal gray, dorsolateral part; PAGdm, periaqueductal gray, dorsomedial  
5 part; PAGl, periaqueductal gray, lateral part; PET, predator exposure test.

6

## 7 **DISCUSSION**

8 Combining the use of pharmaco- and optogenetic circuit manipulation tools and  
9 functional tracing, we untangled the ACA role in processing contextual fear memory to a  
10 predator threat.

11 To test the acquisition and expression of predator contextual fear responses, we used a  
12 two-phase paradigm composed of cat exposure (acquisition phase), and, on the following  
13 day, exposure to the context where the predator had been previously encountered  
14 (expression phase) (see S1 and S2). Notably, the defensive responses in mice differ  
15 somewhat from those seen in rats exposed to cat and then to the predator-associated  
16 context. During cat exposure, rats spend close to 90% of the time freezing and 2% of the  
17 time risk assessing the environment (Ribeiro-Barbosa et al., 2005); mice froze for  
18 approximately 30% of the time and risk assessed the environment for close to 30% of the  
19 time (see S1). During exposure to the predatory context, rats only froze a little and then  
20 spent time risk assessing the predator-related context for 70% of the time (Ribeiro-  
21 Barbosa et al., 2005), which is different from mice that presented no freezing and a  
22 relatively weaker risk assessment response—close to 50% of the time (see S1). An  
23 important feature of the experimental procedure used here was that the behavioral  
24 responses were very stable among the animals tested within each individual phase of the  
25 testing schedule. This feature may be, at least in part, accounted for by the long  
26 habituation period, which appears to stabilize anti-predatory behavioral responses  
27 (Ribeiro-Barbosa et al., 2005).

28 Pharmacogenetic inhibition of the ACA during cat exposure did not change innate  
29 responses but significantly reduced contextual fear responses. This suggests that the ACA  
30 is involved in the acquisition of predator-related contextual fear responses. In line with  
31 these results, studies using fear conditioning to physically aversive stimuli (i.e., foot  
32 shock) have also supported the idea that the ACA appears to be necessary for the  
33 acquisition of contextual fear (Tang et al., 2005; Bissière et al., 2008). Our functional



1 tracing analysis combining retrograde tracer in the ACA and Fos immunostaining  
2 revealed that the ACA is particularly influenced by afferent sources of inputs conveying  
3 contextual information and predator cues during the acquisition phase.

4 Among the cortical inputs, the ventral retrosplenial (RSPv) and medial visual (VISm)  
5 areas presented the largest percentage of FG retrogradely labeled cells expressing Fos  
6 (around 50% of the retrogradely labeled cells). The retrosplenial cortex is critical for  
7 recognition of an environment directly paired with an aversive event (Robinson et al.,  
8 2018). Studies using fear conditioning to physically aversive stimuli (i.e., foot shock)  
9 have shown that the retrosplenial cortex is involved in contextual fear memory (Keene  
10 and Bucci, 2008). Recent studies using two-photon imaging revealed that landmark cues  
11 served as dominant reference points and anchored in the retrosplenial cortex the spatial  
12 code, which is the result of local integration of visual, motor, and spatial information  
13 (Fisher et al., 2020). The VISm is necessary for the visuospatial discrimination used in  
14 the integration of allocentric visuospatial cues (Sánchez et al., 1997; Espinoza et al., 1999)  
15 and may as well be involved in integrating contextual cues. Therefore, the results suggest  
16 that cortical fields projecting to the ACA particularly active during the acquisition phase  
17 of predator fear memory are involved in computing contextual landmarks.

18 In the thalamus, our functional tracing revealed that the central lateral (CL) and ventral  
19 anteromedial thalamic (AMv) nuclei contained more than 50% of the FG retrogradely-  
20 labeled cells expressing Fos during the acquisition phase of predator fear memory. Both  
21 the CL and AMv are likely to convey information regarding the predatory threat. The CL  
22 receives projections from the dorsal part of the periaqueductal gray (Kincheski et al.,  
23 2012), and the AMv receives substantial inputs from the dorsal premammillary nucleus  
24 (Canteras and Swanson, 1992). The dorsal premammillary nucleus is part of the predator-  
25 responsive circuit of the medial hypothalamus (Gross and Canteras, 2012) and is the most  
26 responsive site to a live predator or its odor (Cezario et al., 2008; Dielenberg et al., 2001).

27 In order to test whether the information relayed through the projection from the  
28 anteromedial thalamic nucleus (AM) to the ACA influences the acquisition of predator  
29 fear memory, we silenced the AM > ACA pathway during cat exposure. Photoinhibition  
30 of the AM > ACA projection during cat exposure did not change innate fear responses  
31 but significantly reduced contextual fear responses. This suggests that silencing the AM  
32 > ACA projection impairs the acquisition of contextual fear response to a predator threat.  
33 In line with this result, studies from our group have shown that pharmacological

1 inactivation of the AMv drastically reduced the acquisition but not the expression of  
2 contextual fear responses to predator threats (de Lima et al., 2017). In contrast, anterior  
3 thalamic lesions affect contextual fear conditioning to physically aversive stimuli to a  
4 minor degree (i.e., footshock). Anterior thalamic lesions slow down the acquisition of  
5 contextual fear conditioning but do not affect contextual fear memory tested in the short  
6 term (Dupire et al, 2013; Marchand et al., 2014).

7 Our findings collectively support the idea that the ACA integrates contextual and predator  
8 cues during the acquisition phase to provide predictive relationships between the context  
9 and the threaten stimuli and influence memory storage. The ventral hippocampus and  
10 basolateral amygdala appear as critical sites for memory storage of contextual fear to  
11 predator threats. Ventral hippocampal cytotoxic lesions significantly reduced conditioned  
12 defensive behaviors during re-exposure to the predator-associated context (Pentkowski et  
13 al., 2006). Likewise, cytotoxic NMDA lesions in the basolateral amygdala impaired  
14 contextual fear responses to predator threat (Martinez et al., 2011; Bindi et al., 2018). In  
15 line with these ideas, recent findings from our lab indicates that cycloheximide (a protein  
16 synthesis inhibitor) injection in the basolateral amygdala or the ventral hippocampus  
17 impairs contextual fear responses to predatory threat (F. Reis and N.S. Canteras personal  
18 observations). Therefore, we investigated how the ACA would facilitate associative  
19 plasticity and memory storage in the basolateral amygdala and hippocampus. To this end,  
20 we used optogenetic silencing and functional tracing combining Fluoro Gold and Fos  
21 immunostaining to examine how the ACA entrains selective targets to influence  
22 acquisition or expression of predator fear memory.

23 Among the ACA targets, we start by exploring projections to the basolateral amygdala  
24 and the perirhinal region. Previous model of the prefrontal regulation of memory  
25 formation suggests that the prefrontal cortex is likely to influence associative plasticity  
26 and memory storage in the amygdala and hippocampus using two branches (Gilmartin et  
27 al., 2014). One direct branch is to the basolateral amygdala (BLA) and conveys  
28 information about the predictive value of the relevant clues during learning. The other  
29 branch is to the perirhinal cortices, which occupies a strategic position in this network  
30 influencing both the hippocampus and the amygdala. Tract-tracing studies revealed that  
31 the perirhinal region (PERI) provides dense projections to the basolateral amygdala and  
32 the hippocampal formation (Shi and Cassell, 1999). Photoinhibition of both ACA > BLA  
33 and ACA > PERI pathways during cat exposure significantly reduced contextual fear

1 responses thus suggesting a role in the acquisition of predator fear memory. In contrast,  
2 photoinhibition of both pathways did not influence the expression of contextual fear  
3 memory. Corroborating these findings, our functional tracing revealed that both ACA >  
4 BLA and ACA > PERI paths are significantly more active during the acquisition  
5 compared to the expression of predator contextual fear memory.

6 The POST in turn is necessary for normal acquisition of contextual and auditory fear  
7 conditioning (Robinson and Bucci, 2012). Thus, we tested the ACA > POST pathway as  
8 a putative candidate to influence predator fear memory. However, the ACA > POST  
9 pathway's photoinhibition did not impair either the acquisition or the expression of  
10 contextual fear memory. Likewise, our functional tracing examined the percentage of Fos  
11 positive cells in the ACA projecting to the POST and revealed a relatively low percentage  
12 of double labeled cells both in the acquisition and the expression of predatory contextual  
13 fear memory. However, it is important to recall that the POST is a critical brain region to  
14 guide navigation using both visual and self-movement cues (Yoder et al., 2019).  
15 Therefore, it would be nice to investigate whether this massive ACA > POST pathway  
16 could have a role in shaping navigation in animals facing predator threats.

17 Pharmacogenetic inhibition of the ACA during the exposure to the predatory context  
18 significantly reduced contextual fear responses. This result further suggests that the ACA  
19 is also involved in the expression of predator-related contextual fear responses. Exposure  
20 to the predatory context yielded a different activation pattern among the sources of inputs  
21 to the ACA compared to those seen during cat exposure. Unfortunately, our functional  
22 tracing does not offer any plausible hint regarding the putative source of inputs to the  
23 ACA driving retrieval of memory traces to influence contextual fear expression. In this  
24 regard, we note that the ACA is involved in the consolidation of contextual fear  
25 conditioning to physically aversive stimuli (Einarsson and Nader, 2012). Future work  
26 could investigate whether the ACA is also involved in the consolidation of contextual  
27 fear memory to predator threat and how this consolidation would influence the retrieval  
28 predator fear memory in the ACA.

29 The dorsolateral periaqueductal gray (PAGdl) appears to be a likely ACA target to  
30 influence both the acquisition and expression of contextual fear responses to predator  
31 threats. Previous studies have indicated that the dorsal PAG influences the acquisition of  
32 contextual fear to predatory threat (de Andrade Rufino et al., 2019). Moreover,  
33 considering the involvement of the PAGdl in the expression of predator fear memory, it

1 has been found that exposure to the predatory context yields a significant Fos expression  
2 in the dorsal PAG (Cezario et al., 2008)—a region where electrical, pharmacological, and  
3 optogenetic stimulation have been shown to produce freezing, flight, and risk assessment  
4 behavior in the absence of a predatory threat (Bittencourt et al., 2004; Assareh et al., 2016;  
5 Deng et al., 2016). The present findings showed that photoinhibition of the ACA > PAGdl  
6 pathway during cat exposure did not change innate or contextual fear responses.  
7 Conversely, photoinhibition of the ACA > PAGdl projection during predatory context  
8 altered contextual fear responses. In line with these findings, the functional tracing  
9 revealed that the ACA contained a significantly larger proportion of double labeled  
10 Fos/FG cells for the PAGdl FG injected animals in response to the context versus the cat  
11 exposure. Collectively, our findings revealed that the ACA > PAGdl pathway is  
12 significantly more active during exposure to the predatory context and influences the  
13 expression of contextual fear to predator threat.

14 Overall, the ACA can provide predictive relationships between the context and the  
15 predator threat and influences fear memory acquisition through projections to the  
16 basolateral amygdala and perirhinal region and the expression of contextual fear through  
17 projections to the dorsolateral periaqueductal gray. These findings may be applied in  
18 more general terms to understand memory processing of fear threats entraining  
19 hypothalamic circuits (i.e., such as the predator- and conspecific-responsive circuits  
20 underlying predatory and social threats, respectively) that engage the ventral  
21 anteromedial thalamic > ACA pathway (Gross and Canteras, 2019). Notably, both the  
22 predator- and conspecific-responsive hypothalamic circuits comprise the dorsal  
23 premammillary nucleus that projects densely to the ventral anteromedial thalamic nucleus  
24 (Canteras and Swanson, 1992), and therefore, engage the ventral anteromedial thalamic  
25 > ACA pathway. Of relevance, previous studies showed that the anteromedial thalamus'  
26 cytotoxic lesions impair contextual fear in a social defeat-associated context (Rangel et  
27 al., 2018). Thus, the present results open interesting perspectives for understanding how  
28 the ACA is involved in processing contextual fear memory to predator threats as well as  
29 other ethologic threatening condition such as those seen in confrontation with a  
30 conspecific aggressor during social disputes.

31

32

## 1    **METHODS**

2    **Animals.** Adult male mice, C57BL/6 (n = 192) weighing approximately 28 g were used  
3    in the present study. The mice were obtained from local breeding facilities and were kept  
4    under controlled temperature (23 C) and illumination (12-h cycle) in the animal quarters  
5    with free access to water and a standard laboratory diet. All experiments and conditions  
6    of animal housing were carried out under institutional guidelines [Colégio Brasileiro de  
7    Experimentação Animal (COBEA)] and were in accordance with the NIH Guide for the  
8    Care and Use of Laboratory Animals (NIH Publications No. 80-23, 1996). All of the  
9    experimental procedures had been previously approved by the Committee on the Care  
10    and Use of Laboratory Animals of the Institute of Biomedical Sciences, University of São  
11    Paulo, Brazil (Protocol No. 085/2012). Experiments were always planned to minimize  
12    the number of animals used and their suffering.

13    **Sterotaxic surgery, viral injections and optical fiber implantation.** Mice were  
14    anesthetized in a box saturated with Isoforine (Cristália Laboratories, SP, Brazil) and then  
15    immediately positioned on a stereotaxic instrument (Kopf Instruments, CA, USA). The  
16    anesthesia was maintained with 1-2% Isoforine/oxygen mix and body temperature was  
17    controlled with a heating pad. Viral vectors were injected with a 5 µl Hamilton Syringe  
18    (Neuros Model 7000.5 KH). Injections were delivered at a rate of 5 nl/min using a motorized  
19    pump (Harvard Apparatus). The needle was left in place for 5 min after each injection to  
20    minimize upward flow of viral solution after raising the needle. For the photoinhibition  
21    experiments, immediately after the viral injections, optical fibers (Mono Fiber-optic  
22    Cannulae 200/230-0.48, Doric Lenses Inc. Quebec, Canada) were implanted and fixed onto  
23    animal skulls with dental resin and micro screws (DuraLay, IL, USA). The animals were  
24    allowed 1 week to recover from the surgery, and 3 weeks later we started the behavioral  
25    experiments.

26    For the pharmacogenetic inhibition, ACA was injected bilaterally with 150 nl of AAV5-  
27    hSyn-HA-hM4D(Gi)-IRES-mCitrine (Dr. Bryan Roth; Addgene plasmid #50464) or AAV5-  
28    hSyn-eGFP (titer  $\geq 7 \times 10^{12}$  vg/mL; Addgene viral prep #50465-AAV5) as control. For the  
29    photoinhibition of the AM > ACA projection, mice were bilaterally injected into the AM  
30    (AP -0.7, ML $\pm$  0.5, DV -3.7) with 20 nl of AAV5-hSyn-eNpHR3-mCherry (titer  $\geq 1 \times 10^{13}$   
31    vg/mL; University of North Carolina, Vector Core) or AAV5-hSyn-mCherry (control virus;  
32    titer  $\geq 7 \times 10^{12}$  vg/mL; University of North Carolina, Vector Core), and optical fibers were

1 bilaterally implanted into the ACA (at a 10° angle from the vertical axis; AP +1.0, ML± 0.7,  
2 DV -0.6). For the photoinhibition of the ACA projections to selected targets during  
3 acquisition and expression of contextual fear responses, mice were bilaterally injected into  
4 the ACA (AP +1.0, ML ±0.3, DV -1.1) with 80 nl of AAV5-hSyn-eNpHR3-mCherry (titer  
5  $\geq 1 \times 10^{13}$  vg/mL; University of North Carolina, Vector Core) or AAV5-hSyn-mCherry  
6 (control virus; titer  $\geq 7 \times 10^{12}$  vg/mL; University of North Carolina, Vector Core), and optical  
7 fibers were bilaterally implanted into the BLA (AP -0.95, ML±3.3, DV -3.3), PERI (AP -  
8 3.9, ML ±0.5 from the lateral skull surface, DV -0.5 from the local brain surface), POST (at  
9 a 20° angle from the vertical axis; AP -3.9, ML ±2.7, DV -0.75) or PAGdl (at a 15° angle  
10 from the vertical axis; AP -3.85, ML ±0.9, DV -1.8). For tracing the ACA projections, mice  
11 were unilaterally injected into the ACA (AP +1.0, ML ±0.3, DV -1.1) with 80 nl of AAV5-  
12 hSyn-eNpHR3-mCherry (titer  $\geq 1 \times 10^{13}$  vg/mL; University of North Carolina, Vector Core).

13 **Experimental apparatus and behavioral procedures.** The experimental apparatus was  
14 made of clear Plexiglas and consisted of a Box 1 (with bedding; 15 cm long x 25 cm wide x  
15 30 cm high) connected to a Box 2 (45 x 30 x 30 cm) by a hallway (25 x 10 x 30 cm). The  
16 Box 1 was separated from the hallway by a sliding door, and the Box 2 was divided into two  
17 compartments (15 cm long and 30 cm long) by a wall, which was removed during the  
18 predator exposure test (PET) (see Supplementary Material).

19 *Habituation phase.* For five days, each mouse was placed into Box 1 and left undisturbed  
20 for 5 min. Next, we opened the Box 1 sliding door, and the animal was allowed to explore  
21 the hallway and the Box 2 for 10 min. At the end of this session, the mouse was returned to  
22 its home cage.

23 *Predator Exposure Test (PET).* On the 6<sup>th</sup> day, a neutered 2-years-old male cat was placed  
24 and held in the Box 2 by an experimenter, and the mouse was placed into Box 1, and 5 min  
25 after, the Box 1 sliding door was opened, and the animals were exposed for 5 min to the cat.  
26 After the cat was removed at the end of the 5-min period, the hallway and the Box 2 were  
27 cleaned with 5 % alcohol and dried with paper towels, and the mouse was placed back into  
28 its home cage.

29 *Context.* On the day after the cat exposure, the mouse was placed back into Box 1, and 5 min  
30 after, the Box 1 sliding door was opened, and the mouse was exposed for 5 min to the  
31 environment where the predator had been previously encountered.



1 *Behavior analysis.* All behavioral sessions were recorded using a high-speed (120fps)  
2 camera (DMC-FZ200, Panasonic) and they were blindly scored by a trained observer using  
3 the BORIS software (Behavior Observation Research Interactive Software). The behavioral  
4 data were processed in terms of duration (total duration per session). The following  
5 behaviors were measured:

6 - Freezing: cessation of all movements, except for those associated with breathing;

7 - Risk-assessment behaviors: comprising crouch-sniff (animal immobile with the back  
8 arched, but actively sniffing and scanning the environment) and stretch postures (consisting  
9 of both stretch attend posture, during which the body is stretched forward and the animal is  
10 motionless, and stretch approach, consisting of movement directed toward the cat  
11 compartment with the animal's body in a stretched position);

12 - Fearless exploration: including nondefensive locomotion and exploratory up-right position  
13 (i.e., animals actively exploring the environment, standing over the rear paws and leaning  
14 on the walls with the forepaws).

15 **Pharmacogenetic inhibition.** Animals were previously habituated to the handling, and on  
16 the last 3 days of the habituation phase received injections of 0.2 ml of saline i.p. For the  
17 pharmacogenetic inhibition, animals were injected with 1 mg/kg of clozapine-N-oxide i.p.  
18 (CNO; Tocris Bioscience, UK) 30 min before the beginning of the behavioral test.

19 *Experimental design:* Animals were tested for the Acquisition and the Expression phases.  
20 For the Acquisition phase, we tested a group of animals expressing Gi-coupled hM4Di  
21 (hM4D+; n= 7) and a control group (hM4D-; n= 6), both of which were injected with CNO  
22 prior to the PET and saline prior to the Context (Figure 1B). Similarly, for the Expression  
23 phase, we tested a group of animals expressing Gi-coupled hM4Di (hM4D+; n= 7) and a  
24 control group (hM4D-; n= 5), both of which received saline injection prior to the PET and  
25 CNO injection prior to the Context exposure (Figure 1C).

26 **Optogenetic inhibition.** Animals were previously habituated to the optogenetic cables on  
27 the last 3 days of the habituation phase of the behavioral paradigm. This procedure consisted  
28 of plugging optogenetic cables to the implanted fiber-optic cannulae and letting the animals  
29 explore the apparatus for 5 min without any additional stimulus. Optogenetic inhibition was

1 induced by exposing animals continuously to a yellow laser (589 nm, Low-Noise DPSS  
2 Laser System, Laserglow Technologies).

3 *Experimental design.* For the photoinhibition of the AM > ACA pathway, we tested a group  
4 of animals expressing halorhodopsin-3.0 (HR+; n= 8) and a control group (HR-; n= 7), both  
5 of which had the yellow laser turned ON during PET and turned OFF during the context  
6 exposure. For the photoinhibition of the ACA projections to the selected targets during  
7 acquisition and expression of contextual fear responses, animals were tested for the  
8 Acquisition and the Expression phases. For the Acquisition phase, we tested groups of  
9 animals expressing halorhodopsin-3.0 (HR+) and control groups (HR-) that had the yellow  
10 laser turned ON during PET and turned OFF during the context exposure (ACA > BLA  
11 pathway - HR+ n= 8, HR- n= 6; ACA > PERI pathway - HR+ n= 6, HR- n= 5; ACA > POST  
12 pathway - HR+ n= 6, HR- n= 5; ACA > PAGdl pathway - HR+ n= 7, HR- n= 5). Similarly,  
13 for the Expression phase, we tested groups of animals expressing halorhodopsin-3.0 (HR+)  
14 and control groups (HR-) that had the yellow laser turned OFF during PET and turned ON  
15 during the context exposure (ACA > BLA pathway - HR+ n= 8, HR- n=6); ACA > PERI  
16 pathway - HR+ n= 6, HR- n= 5; ACA > POST pathway - HR+ n= 7, HR- n=5; ACA >  
17 PAGdl pathway - HR+ n= 9, HR- n=5).

18 **Functional tracing. Fluoro Gold injection.** FG injections followed the same anesthetic and  
19 stereotaxic procedures described for the viral injections. Iontophoretic deposits of 2 %  
20 solution of Fluoro Gold (FG; Fluorochrome Inc., Colo, USA) was applied unilaterally into  
21 the ACA (AP +1.0, ML +0.3, DV -1.1), BLA (AP -0.95, ML +3.3, DV -3.45), PERI (AP -  
22 3.9, ML -0.4 from the lateral skull surface, DV -0.9 from the local brain surface), POST (at  
23 a 20° angle from the vertical axis; AP -3.9, ML +2.7, DV -1.15) or PAGdl (AP -3.85, ML  
24 +0.45, DV -2.1). Deposits were made over 5 min through a glass micropipette (tip diameter,  
25 15 µm) by applying a +3 µA current, pulsed at 7-second intervals, with a constant-current  
26 source (Midgard Electronics, Wood Dale, Ill, USA, model CS3).

27 *Experimental design.* After 7 days of recovering from surgery, we started the behavioral  
28 procedures. To study the activation pattern of the different ACA source of inputs during  
29 the cat exposure and the predatory context, ACA FG injected animals were perfused 90  
30 min after the PET (n=6) or the Context exposure (n= 6). To quantify the relative amount  
31 of activation of the ACA projections to the selected targets during the acquisition and  
32 expression of contextual fear to predator threat, FG injected animals into the selected

1 targets were perfused 90 min after the PET (BLA n=4; PERI n=4; POST n=4; PAGdl  
2 n=4) or the Context exposure (BLA n=4; PERI n=4; POST n=4; PAGdl n=4).

3 **Perfusion and histological processing.** After the experimental procedures, animals were  
4 deeply anesthetized in a box saturated with Isoforine and transcardially perfused with a  
5 solution of 4.0 % paraformaldehyde in 0.1 M phosphate buffer at pH 7.4. The brains were  
6 removed and left overnight in a solution of 20 % sucrose in 0.1 M phosphate buffer at 4  
7 C. The brains were then frozen, and 5 series of 30 mm-thick sections were cut with a  
8 sliding microtome in the frontal plane. Sections from all the viruses and FG injections  
9 were taken to the fluorescent microscope to verify the injection sites and projection fields  
10 evidenced by the fluorescent reporters.

11 *FG/Fos immunofluorescence double-labeling.* One series of sections was washed with  
12 KPBS to remove the cryoprotectant solution and then incubated with polyclonal rabbit anti-  
13 c-Fos (PC-38; Calbiochem-Millipore) at 1:20000 in 0.5% Blocking Reagent (Roche) in  
14 KPBS for 48 h at 4 °C. Sections were then washed in KPBS and incubated with Anti-Rabbit  
15 Alexa 594 Goat IgG (H+L) (Invitrogen) at 1:500 during 2 h at random temperature (RT).  
16 Sections were then washed in KPBS and incubated with rabbit anti-FG antibody (1:5000;  
17 Chemicon International, Calif, USA) in 0.5% Blocking Reagent (Roche) in KPBS for 16 h  
18 at 4 °C. The Sections were then washed in KPBS and incubated with Anti-Rabbit Alexa 488  
19 Goat IgG (H+L) (Invitrogen) at 1:1000 during 1.5 h at RT. At the end, the sections were  
20 mounted in gelatin-coated slides, the nuclei were counterstained with DAPI (Sigma) at  
21 1:20000 in TBS and cover slipped with Fluoromount (Sigma). Slides were stored at 4° C in  
22 humid chambers until image capture.

23 **Image capture and analysis.** Brain regions of interest were determined using the *Allen*  
24 *Mouse Brain Atlas*. Images were captured using an epi-fluorescence microscope (NIKON,  
25 Eclipse E400) coupled to a digital camera (NIKON, DMX 1200). ImageJ public domain  
26 image processing software (FIJI v1.47f) was used for image analysis. For the documentation  
27 of the viral injection sites and projection fields of viral transfected cells, we captured only  
28 the fluorescence emitted from the fluorescent reporters. For the functional tracing studies,  
29 Fos and FG were immunodetected and labeled with Alexa 594 and Alexa 488, respectively.  
30 To determine the activation pattern of the different ACA source of inputs during the cat  
31 exposure and the predatory context, we first selected the sites containing more than 10  
32 percent of FG labeled cells expressing Fos protein. For each one of these sites, we first

1 delineated the borders of the selected region and FG and FG/FOS double-labeled cells were  
2 counted therein. The number of counted cells were corrected by the quantified area. To  
3 quantify the relative amount of activation of the ACA projections to the selected targets  
4 during the acquisition and expression of contextual fear to predator threat, we averaged the  
5 counting from three serial 60 $\mu$ m apart sections, where, in each section, we delineated the  
6 ACA borders, counted FG and FG/FOS labeled cells and corrected by the quantified area.

7 **Electrophysiology.** *Slice preparation:* Slices were prepared using a Leica VT1000s  
8 vibratome as described previously (McKay et al., 2009; Oh et al., 2013). Briefly, mice were  
9 deeply anesthetized with isoflurane and decapitated. The brains were quickly removed,  
10 immersed in ice-cold aCSF (artificial cerebrospinal fluid) solution bubbled with  
11 95% O<sub>2</sub>/5% CO<sub>2</sub> and sliced. The aCSF solution containing (in mM): 125 NaCl, 2.5 KCl, 1.25  
12 NaH<sub>2</sub>PO<sub>4</sub>, 26 NaHCO<sub>3</sub>, 2 CaCl<sub>2</sub>, 1 MgSO<sub>4</sub>, and 25 glucose. The cut slices were transferred  
13 immediately to a warm (37°C) submerged holding chamber filled with aCSF and kept in this  
14 chamber for 30 min. Next, the slices were allowed to return to room temperature (~25°C)  
15 for at least 40 min before electrophysiology experiments.

16 *Patch-clamp:* Whole cell current-clamp recordings were made in aCSF at 34 $\pm$ 0.5°C from  
17 visualized neurons using a CMOS camera (Flash4.0, Hamamatsu) mounted on SliceScope  
18 Pro 3000 microscope (Scientifica, UK); using a long working distance 40X (0.8 NA) water-  
19 immersion objective and infrared differential interference contrast optics. Patch electrodes,  
20 yielding 4-6M $\Omega$  resistance, contained (in mM): 130 KMeSO<sub>4</sub>, 10 KCl, 10 HEPES, 4 ATP  
21 magnesium salt, 0.4 GTP disodium salt, with pH corrected to 7.3 with KOH and osmolarity  
22 of 295 $\pm$ 5 mOsm. Neurons were included if they had a resting membrane potential of less  
23 than -60mV, an input resistance >25M $\Omega$ , AP amplitude of >80mV from rest (calculated from  
24 the resting potential of the cell until the peak of the AP, which was evoked by brief square  
25 pulses [2ms, 1.5nA]), and stable series resistance of <20M $\Omega$ . Resting membrane potential  
26 was measured immediately after breaking into the cell. Electrode capacitance and series  
27 resistance were monitored and compensated throughout recording; cells were held between  
28 -65 to -66mV with injected current. Data were collected using a Multiclamp 700A amplifier,  
29 pClamp 10.7 software and digitized (10kHz) using a Digidata 1440 AD converter. All from  
30 Molecular Devices (USA). Data were analyzed using Clampfit 10.7 software (Molecular  
31 Devices, USA). Input resistance was calculated as the slope of the V-I curve using 500ms

1 current steps from  $\geq 300$ pA to 0pA at 50pA steps. Action potentials (APs) were evoked using  
2 ramp current pulses (100ms pulses ranging from 100 to 500pA at 100pA steps).

3 *Optogenetics*: The transfected neurons with the AAV5-hSyn-eNpHR3-mCherry or AAV5-  
4 hSyn-mCherry were identified and stimulated using a pE-2 light source (CoolLED, UK).  
5 The wavelength of 585nm was used to identify and activate halorhodopsin-transfected cells.  
6 The wavelength was filtered using a double-band fluorescence cube (59022-filter set;  
7 Chroma, USA).

8 *Pharmacogenetic*: The neurons transfected with the pAAV-hSyn-HA-hM4D(Gi)-IRES-  
9 mCitrine or AAV5-hSyn-eGFP were identified using a pE-2 light source (CoolLED, UK).  
10 The wavelength of 470nm, filtered by the 59022 cube-set (Chroma, USA) was used to  
11 identify the transfected cells in the brain slices. CNO was superfused at a flow rate of  
12  $\sim 3$ ml/min.

### 13 **Statistical analysis for Fos-FG double-immunofluorescence.**

14 To evaluate the potential discrepancy between the proportion of *FG/Fos* double labeled cells  
15 in the cat exposure condition in comparison to the predatory context condition, we employed  
16 a 2x2 chi-square test with Yates' correction for continuity, separately for each injection site.  
17 To maintain the overall type I error at 5%, the significance level employed in each test was  
18 adjusted downward (Bonferroni's correction) according to the total number of analyses  
19 performed ( $\alpha = 0.0125$ ). The 95% confidence intervals for proportions were calculated using  
20 ESCI – Exploratory Software for Confidence Intervals (Cumming, 2012).

### 21 **Statistical analysis for behavioral measurements.**

22 After testing for homogeneity of variance (Levine's test), the behavioral data were square-  
23 root transformed whenever the null hypothesis of homoscedasticity was rejected. For all  
24 experiments, the analysis was performed by means of a parametric univariate analysis of  
25 variance (ANOVA), followed by a post hoc analysis (Tukey's HSD test) when appropriate.  
26 The specific design varied depending on the structure of each experiment, ranging from one-  
27 way to three-way ANOVAs. Due to an expressive number of analyses performed and to  
28 maintain the overall type I error at 5%, the significance level employed in each ANOVA  
29 was adjusted downward by means of a Bonferroni's correction ( $\alpha = 0.0028$ ). The average  
30 results are expressed as the mean  $\pm$  SEM throughout the text and effect sizes are expressed



1 as partial eta-squared. Two-tailed tests were used throughout the statistical analyses for both  
2 cell counting and behavioral measurements.

3

#### 4 **Acknowledgments:**

5 This research was supported by Fundação de Amparo à Pesquisa do Estado de São Paulo  
6 (FAPESP) Research Grants #2014/05432-9 (to NSC) and #2019/27245-0 (to FAO).  
7 FAPESP fellowships to MAXL (#2016/10389-0).

8

#### 9 **Author Contributions**

10 MAXL and NSC - conceptualized the project, designed the study, analyzed data,  
11 interpreted results prepared and edited the manuscript. FAO performed and analyzed the  
12 patch clamp studies and MVCB analyzed data and performed the statistical analysis.

13

#### 14 **Financial Disclosures/Conflict of Interest**

15 The authors have no competing financial interests or potential conflicts of interest.

16

#### 17 **REFERENCES**

18 Abate, G., Colazingari, S., Accoto, A., Conversi, D., and Bevilacqua, A. (2018).  
19 Dendritic spine density and EphrinB2 levels of hippocampal and anterior cingulate cortex  
20 neurons increase sequentially during formation of recent and remote fear memory in the  
21 mouse. *Behav. Brain Res.* 344, 120–131.

22 Assareh, N., Sarrami, M., Carrive, P., and McNally, G.P. (2016). The organization of  
23 defensive behavior elicited by optogenetic excitation of rat lateral or ventrolateral  
24 periaqueductal gray. *Behav. Neurosci.* 130, 406–414.

25 Bindi, R.P., Baldo, M.V.C., and Canteras, N.S. (2018). Roles of the anterior basolateral  
26 amygdalar nucleus during exposure to a live predator and to a predator-associated context.  
27 *Behav. Brain Res.* 342, 51–56.

28 Bissière, S., Plachta, N., Hoyer, D., McAllister, K. H., Olpe, HR, Grace, A. A., and Cryan  
29 J. F. (2008). The rostral anterior cingulate cortex modulates the efficiency of amygdala-  
30 dependent fear learning. *Biol. Psychiatry.* 63, 821–831.

- 1 Bittencourt, A.S., Carobrez, A.P., Zamprogno, L.P., Tufik, S., and Schenberg, L.C.  
2 (2004). Organization of single components of defensive behaviors within distinct  
3 columns of periaqueductal gray matter of the rat: role of N-methyl-D-aspartic acid  
4 glutamate receptors. *Neuroscience* 125, 71–89.
- 5 Blanchard, R.J., Blanchard, D.C., and Hori, K. (1989). Ethoexperimental approaches to  
6 the study of defensive behavior. In *Ethoexperimental Approaches to the Study of*  
7 *Behavior* (Academic Publishers, Dordrecht, Kluwer), pp. 114–136.
- 8 Blanchard, R.J., Yang, M., Li, C-I., Garvacio, A. and Blanchard, D.C. (2001). Cue and  
9 context conditioning of defensive behaviors to cat odor stimuli. *Neurosci. Biobehav. Rev.*  
10 26, 587–595.
- 11 Canteras, N.S. and Swanson, L.W. (1992). The dorsal premammillary nucleus: an unusual  
12 component of the mammillary body. *Proc Natl Acad Sci USA* 89, 10089–10093.
- 13 Cezario, A.F., Ribeiro-Barbosa, E.R., Baldo, M.V. and Canteras, N.S. (2008).  
14 Hypothalamic sites responding to predator threats--the role of the dorsal premammillary  
15 nucleus in unconditioned and conditioned antipredatory defensive behavior. *Eur. J.*  
16 *Neurosci.* 28, 1003–15. (2008).
- 17 Cumming, G. (2012). *Understanding The New Statistics: Effect Sizes, Confidence*  
18 *Intervals, and Meta-Analysis.* (Routledge, New York).
- 19 de Andrade Rufino, R., Mota-Ortiz, S.R., De Lima, M.A.X., Baldo, M.V.C. and Canteras,  
20 N.S. (2019). The rostradorsal periaqueductal gray influences both innate fear responses  
21 and acquisition of fear memory in animals exposed to a live predator. *Brain Struct. Funct.*  
22 224, 1537-1551.
- 23 de Lima, M.A., Baldo, M.V. and Canteras, N.S. (2017). A role for the anteromedial  
24 thalamic nucleus in the acquisition of contextual fear memory to predatory threats. *Brain*  
25 *Struct. Funct.* 222, 113–129.
- 26 de Lima, M.A.X., Baldo, M.V.C. and Canteras, N.S. (2019). Revealing a cortical circuit  
27 responsive to predatory threats and mediating contextual fear memory. *Cereb. Cortex.* 29,  
28 3074–3090.
- 29 Deng, H., Xiao, X. and Wang, Z. (2016). Periaqueductal gray neuronal activities underlie  
30 different aspects of defensive behaviors. *J. Neurosci.* 36, 7580–7588.
- 31 Dielenberg, R.A., Hunt, G.E. and McGregor, I.S. (2001). “When a rat smells a cat”: the  
32 distribution of Fos immunoreactivity in rat brain following exposure to a predatory odor.  
33 *Neuroscience* 104, 1085–1097.
- 34 Ding, S.L. (2013). Comparative anatomy of the prosubiculum, subiculum, presubiculum,  
35 postsubiculum, and parasubiculum in human, monkey, and rodent. *J. Comp. Neurol.* 521,  
36 4145–4162.
- 37 Dupire, A., Kant, P., Mons, N., Marchand, A.R., Coutureau, E., Dalrymple-Alford, J.,  
38 and Wolf, M. (2013). A role for anterior thalamic nuclei in affective cognition: inter-  
39 action with environmental conditions. *Hippocampus* 23, 392–404.

- 1 Einarsson, E.Ö. and Nader, K. (2012). Involvement of the anterior cingulate cortex in  
2 formation, consolidation, and reconsolidation of recent and remote contextual fear  
3 memory. *Learn. Mem.* 19, 449–52.
- 4 Espinoza, S., Pinto-Hamuy, T., Passig, C., Carreño, F., Marchant, F., and Urzúa, C.  
5 (1999). Deficit in the water-maze after lesions in the anteromedial extrastriate cortex in  
6 rats. *Physiol. Behav.* 66, 493–496.
- 7 Fischer, L.F., Soto-Albors, R.M., Buck, F. and Harnett, M.T. (2020). Representation of  
8 visual landmarks in retrosplenial cortex. *Elife* 9, e51458.
- 9 Frankland, P.W., Bontempi, B., Talton, L.E., Kaczmarek, L. and Silva, A.J. (2004). The  
10 involvement of the anterior cingulate cortex in remote contextual fear memory. *Science*  
11 304, 881–3.
- 12 Gilmartin, M.R., Balderston, N.L. and Helmstetter, F.J. (2014). Prefrontal cortical  
13 regulation of fear learning. *Trends Neurosci.* 37, 455–64.
- 14 Gross, C.T. and Canteras, N.S. (2012). The many paths to fear. *Nat. Rev. Neurosci.* 13,  
15 651–658.
- 16 Keene, C.S. and Bucci, D.J. (2008). Neurotoxic lesions of retrosplenial cortex disrupt  
17 signaled and unsignaled contextual fear conditioning. *Behav. Neurosci.* 122, 1070–1077.
- 18 Kincheski, G.C., Mota-Ortiz, S.R., Pavesi, E., Canteras, N.S. and Carobrez, A.P. (2012).  
19 The dorsolateral periaqueductal gray and its role in mediating fear learning to life  
20 threatening events. *PLoS One* 7, e50361.
- 21 Kitamura, T., Ogawa, S.K., Roy, D.S., Okuyama, T., Morrissey, M.D., Smith, L.M.,  
22 Redondo, R.L., and Tonegawa, S. (2017). Engrams and circuits crucial for systems  
23 consolidation of a memory. *Science* 356, 73–78.
- 24 Marchand, A., Faugère, A., Coutureau, E. and Wolff, M. (2014). A role for anterior  
25 thalamic nuclei in contextual fear memory. *Brain Struct. Funct.* 219, 1575–1586.
- 26 Martinez, R.C., Carvalho-Netto, E.F., Ribeiro-Barbosa, E.R., Baldo, M.V. and Canteras,  
27 N.S. (2011). Amygdalar roles during exposure to a live predator and to a predator-  
28 associated context. *Neuroscience* 172, 314–328.
- 29 McKay, B.M., Matthews, E.A., Oliveira, F.A. and Disterhoft J.F. (2009). Intrinsic  
30 neuronal excitability is reversibly altered by a single experience in fear conditioning. *J.*  
31 *Neurophysiol.* 102, 2763–2770.
- 32 Oh, M.M., Oliveira, F.A., Waters, J. and Disterhoft, J.F. (2013). Altered calcium  
33 metabolism in aging CA1 hippocampal pyramidal neurons. *J. Neurosci.* 33, 7905–7911.
- 34 Pentkowski, N.S., Blanchard, D.C., Lever, C., Litvin, Y. and Blanchard, R.J. (2006).  
35 Effects of lesions to the dorsal and ventral hippocampus on defensive behaviors in rats.  
36 *Eur. J. Neurosci.* 23, 2185–2196.

- 1 Rangel, M.J. Jr, Baldo, M.V.C. and Canteras, N.S. (2018). Influence of the anteromedial  
2 thalamus on social defeat-associated contextual fear memory. *Behav. Brain Res.* 339,  
3 269–277.
- 4 Ribeiro-Barbosa, E.R., Canteras, N.S., Cezário, A.F., Blanchard, R.J. and Blanchard,  
5 D.C. (2005). An alternative experimental procedure for studying predator-related  
6 defensive responses. *Neurosci. Biobehav. Rev.* 29, 1255–1263.
- 7 Robinson, S. and Bucci, D.J. (2012). Fear conditioning is disrupted by damage to the  
8 postsubiculum. *Hippocampus* 22, 1481–1491.
- 9 Robinson, S., Adelman, J.S., Mogul, A.S., Ihle, P.C.J. and Davino, G.M. (2018). Putting  
10 fear in context: Elucidating the role of the retrosplenial cortex in context discrimination  
11 in rats. *Neurobiol. Learn. Mem.* 148, 50–59.
- 12 Sánchez, R.F., Montero, V.M., Espinoza, S.G, Díaz, E., Canitrot, M., and Pinto-Hamuy,  
13 T. (1997). Visuospatial discrimination deficit in rats after ibotenate lesions in  
14 anteromedial visual cortex. *Physiol. Behav.* 62, 989–994.
- 15 Shi, C.J. and Cassell, M.D. (1999). Perirhinal cortex projections to the amygdaloid  
16 complex and hippocampal formation in the rat. *J. Comp. Neurol.* 406, 299–328.
- 17 Tang, J., Ko, S., Ding, H.K., Qiu, C.S., Calejesan, A.A., and Zhuo, M. (2005). Pavlovian  
18 fear memory induced by activation in the anterior cingulate cortex. *Mol. Pain* 1, 6.
- 19 Vetere, G., Restivo, L., Novembre, G., Aceti, M., Lumaca, M., and Ammassari-Teule, M.  
20 (2011). Extinction partially reverts structural changes associated with remote fear  
21 memory. *Learn. Mem.* 18, 554–557.
- 22 Yoder, R.M., Valerio, S., Crego, A.C.G., Clark, B.J. and Taube, J.S. (2019). Bilateral  
23 postsubiculum lesions impair visual and nonvisual homing performance in rats. *Behav.*  
24 *Neurosci.* 133, 496–507.  
25  
26  
27
